# Supplementary material for: Effectiveness in Regular Practice of Collaborative Care for Depression Among Adolescents: A Retrospective Cohort Study
Source: Atypon-hosted journal article supplement (doi:10.1176/appi.ps.201700298), 2018-02-15
Supplement: appi.ps.201700298.ds001.pdf [file appi.ps.201700298.ds001.pdf]

## Online supplement

| <b>Baseline and follow-up differences among eligible analytic sample, with comparisons separated by reason for non-treatment</b> |                   |     |                                       |     |                  |     |
|----------------------------------------------------------------------------------------------------------------------------------|-------------------|-----|---------------------------------------|-----|------------------|-----|
|                                                                                                                                  | <b>Comparison</b> |     |                                       |     | <b>Treatment</b> |     |
|                                                                                                                                  | Opted out (n=139) |     | EMERALD not available at site (n=360) |     | EMERALD (n=162)  |     |
|                                                                                                                                  | Mean ± Std. Dev.  | %   | Mean ± Std. Dev.                      | %   | Mean ± Std. Dev. | %   |
| Female                                                                                                                           |                   | 67% |                                       | 69% |                  | 81% |
| white non-Hispanic                                                                                                               |                   | 71% |                                       | 86% |                  | 72% |
| Age                                                                                                                              | 15.0 ± 1.7        |     | 14.8 ± 1.6                            |     | 14.9 ± 1.5       |     |
| Baseline PHQ-9A score                                                                                                            | 13.7 ± 4.2        |     | 14.7 ± 4.2                            |     | 15.2 ± 4.1       |     |
| Number of measurements in extracted data                                                                                         | 5.5 ± 5.1         |     | 5.2 ± 4.3                             |     | 13.5 ± 8.3       |     |
| Number of days from baseline to latest measure in data extraction                                                                | 254.8 ± 304.5     |     | 212.1 ± 233.7                         |     | 373.9 ± 298.3    |     |

# Density and box plots indicating balance of propensity scores in raw versus matched data

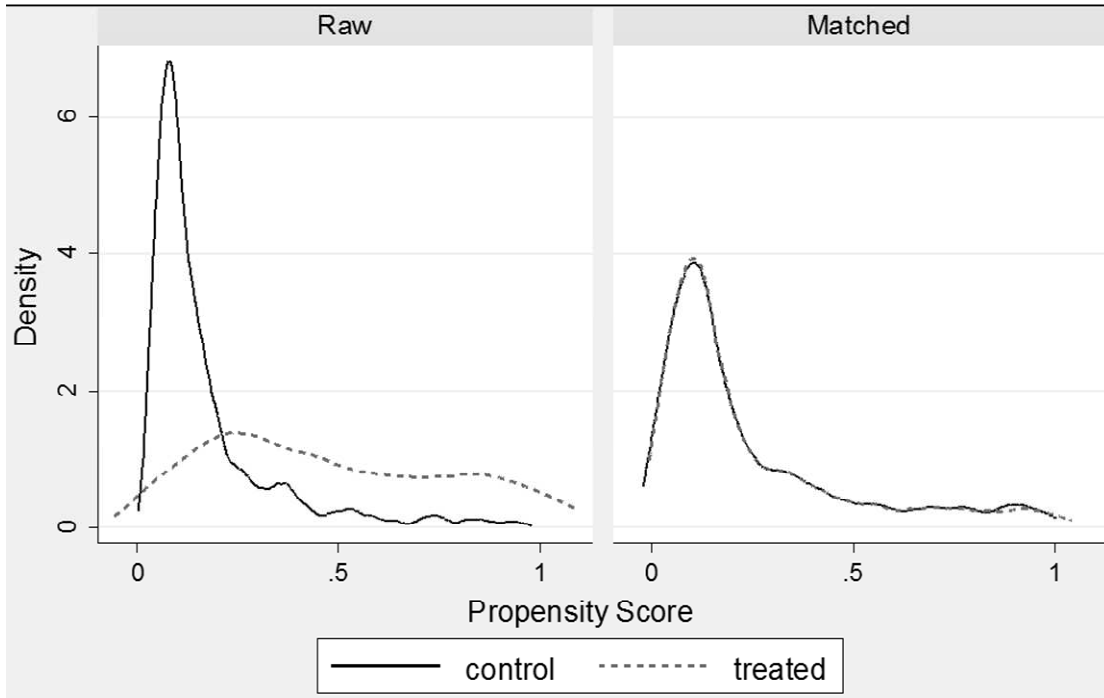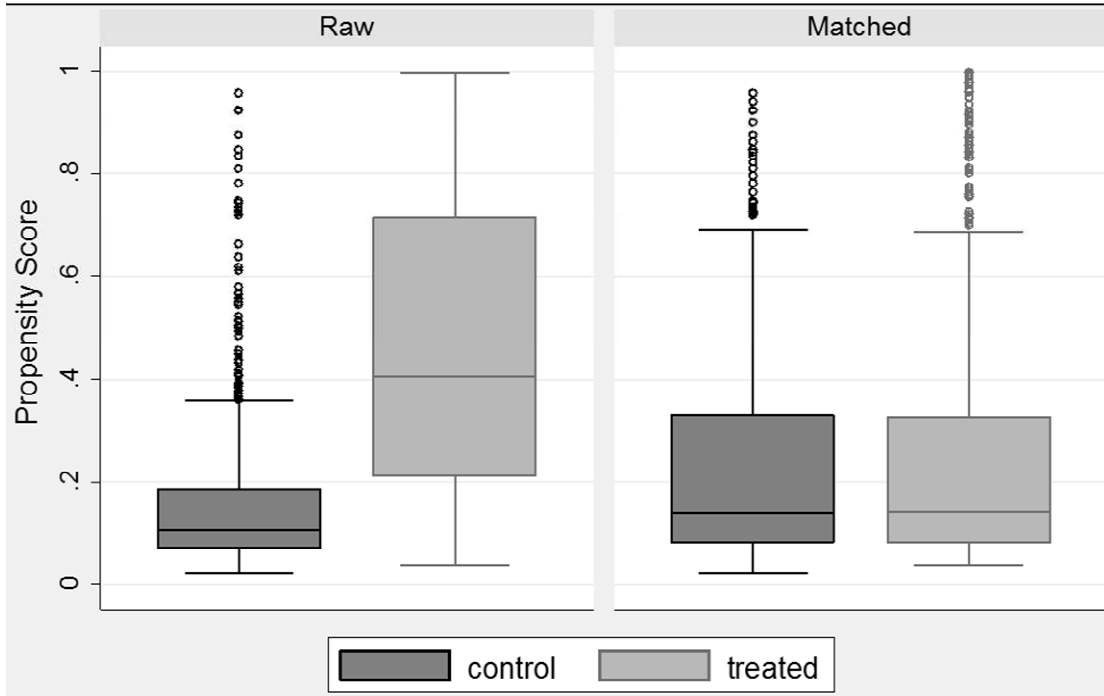

| <b>Full results from logistic regression of treatment response and remission of depression on EMERALD participation and covariates</b> |                    |         |                |       |                      |         |                |       |
|----------------------------------------------------------------------------------------------------------------------------------------|--------------------|---------|----------------|-------|----------------------|---------|----------------|-------|
|                                                                                                                                        | Treatment response |         |                |       | Depression remission |         |                |       |
|                                                                                                                                        | Odds ratio         | p-value | 95% Conf. Int. |       | Odds ratio           | p-value | 95% Conf. Int. |       |
| In EMERALD                                                                                                                             | 2.03               | 0.003   | 1.28           | 3.23  | 1.86                 | 0.019   | 1.10           | 3.12  |
| Age                                                                                                                                    | 1.01               | 0.863   | 0.91           | 1.13  | 1.08                 | 0.197   | 0.96           | 1.23  |
| Female                                                                                                                                 | 0.75               | 0.156   | 0.51           | 1.11  | 0.64                 | 0.046   | 0.41           | 0.99  |
| white, non-Hispanic                                                                                                                    | 1.17               | 0.510   | 0.73           | 1.88  | 1.19                 | 0.535   | 0.69           | 2.05  |
| Number of measurements in extracted data                                                                                               | 1.07               | 0.007   | 1.02           | 1.11  | 1.07                 | 0.003   | 1.02           | 1.12  |
| Number of days from baseline to latest measure in data extraction                                                                      | 1.00               | 0.046   | 1.00           | 1.00  | 1.00                 | 0.072   | 1.00           | 1.00  |
| Had six-month follow-up (did not use last observation carried forward)                                                                 | 2.32               | <0.001  | 1.52           | 3.55  | 2.27                 | 0.001   | 1.42           | 3.64  |
| Baseline PHQ-9A score                                                                                                                  | 1.06               | 0.004   | 1.02           | 1.11  | 0.96                 | 0.163   | 0.91           | 1.02  |
| Use of interpreter                                                                                                                     | 2.12               | 0.433   | 0.32           | 13.91 | 1.91                 | 0.468   | 0.33           | 11.05 |
| Intercept                                                                                                                              | 0.08               | 0.004   | 0.01           | 0.45  | 0.07                 | 0.009   | 0.01           | 0.51  |
